# Supplementary material for: NH4B11O16(OH)2: a new ammonium borate with wavy-shaped polycyclic 2∞[B11O16(OH)2] layers
Source: Royal Society of Chemistry journal article supplement (doi:10.1039/c8nj02359j), 2018-01-01

## Electronic Supplementary Information for:

### **$\text{NH}_4\text{B}_{11}\text{O}_{16}(\text{OH})_2$ : A New Ammonium Borate with Wavy-Shaped**

### **Polycyclic $\infty[\text{B}_{11}\text{O}_{16}(\text{OH})_2]$ Layers**

Chunmei Huang,<sup>1,2</sup> Fangfang Zhang,<sup>1,\*</sup> Bingbing Zhang,<sup>1</sup> Zhihua Yang,<sup>1</sup> Shilie Pan<sup>1,\*</sup>

<sup>1</sup>CAS Key Laboratory of Functional Materials and Devices for Special Environments;

Xinjiang Technical Institute of Physics & Chemistry, CAS; Xinjiang Key Laboratory

of Electronic Information Materials and Devices, 40-1 South Beijing Road, Urumqi

830011, China.

<sup>2</sup>University of Chinese Academy of Sciences, Beijing 100049, China.

\*Corresponding authors: ffzhang@ms.xjb.ac.cn, slpan@ms.xjb.ac.cn.

**Table S1.** Atomic coordinates ( $\times 10^4$ ), equivalent isotropic displacement parameters ( $\text{\AA}^2 \times 10^3$ ) and bond valence sum (BVS) calculations for  $\text{NH}_4\text{B}_{11}\text{O}_{16}(\text{OH})_2$ .  $U(\text{eq})$  is defined as one third of the trace of the orthogonalized  $U_{ij}$  tensor.

| Atoms                    | $x$     | $y$      | $z$      | $U(\text{eq})$ | BVS              |
|--------------------------|---------|----------|----------|----------------|------------------|
| N(1)                     | 5000    | 7926(4)  | 7500     | 37(1)          |                  |
| B(1)                     | 2791(2) | 10224(3) | 10076(3) | 24(1)          | 2.8              |
| B(2)                     | 1432(2) | 9336(4)  | 10681(3) | 25(1)          | 3.1              |
| B(3)                     | 2252(2) | 11240(3) | 11731(3) | 21(1)          | 3.0              |
| B(4)                     | 4054(2) | 10913(3) | 8975(3)  | 21(1)          | 3.1              |
| B(5)                     | 266(2)  | 7591(3)  | 9563(3)  | 22(1)          | 3.1              |
| B(6)                     | 5000    | 11488(5) | 7500     | 20(1)          | 3.1              |
| O(1) <sub>hydroxyl</sub> | 2347(1) | 12239(2) | 12569(2) | 30(1)          | 1.1 <sup>a</sup> |
| O(2)                     | 2881(1) | 11213(2) | 10961(2) | 24(1)          | 2.0              |
| O(3)                     | 1534(1) | 10294(2) | 11587(2) | 28(1)          | 2.0              |
| O(4)                     | 2073(1) | 9278(2)  | 9946(2)  | 30(1)          | 1.8              |
| O(5)                     | 3362(1) | 10121(2) | 9273(2)  | 28(1)          | 2.1              |
| O(6)                     | 4479(1) | 11920(2) | 9790(2)  | 26(1)          | 2.0              |
| O(7)                     | 4324(1) | 10635(2) | 7929(2)  | 22(1)          | 1.9              |
| O(8)                     | 663(1)  | 8496(2)  | 10504(2) | 26(1)          | 2.1              |
| O(9)                     | 578(1)  | 7338(2)  | 8544(2)  | 23(1)          | 1.9              |
| H(1)                     | 1957    | 12138    | 12994    | 44             |                  |
| H(2)                     | 4762    | 7340     | 8032     | 150(20)        |                  |
| H(3)                     | 5093    | 8579     | 8016     | 270(40)        |                  |

<sup>a</sup> bond valence sum of O1 without hydrogen coordinates.

**Table S2.** Selected bond lengths (Å) and angles (°) for NH<sub>4</sub>B<sub>11</sub>O<sub>16</sub>(OH)<sub>2</sub>.

|                |          |                    |            |
|----------------|----------|--------------------|------------|
| B(1)–O(5)      | 1.351(4) | B(4)–O(6)          | 1.373(4)   |
| B(1)–O(2)      | 1.372(4) | B(4)–O(5)          | 1.374(3)   |
| B(1)–O(4)      | 1.374(4) | B(5)–O(9)          | 1.328(4)   |
| B(2)–O(8)      | 1.349(4) | B(5)–O(8)          | 1.370(4)   |
| B(2)–O(3)      | 1.361(4) | B(5)–O(6)#1        | 1.384(3)   |
| B(2)–O(4)      | 1.369(4) | B(6)–O(7)#2        | 1.460(3)   |
| B(3)–O(1)      | 1.344(4) | B(6)–O(7)          | 1.460(3)   |
| B(3)–O(3)      | 1.372(4) | B(6)–O(9)#3        | 1.471(3)   |
| B(3)–O(2)      | 1.384(3) | B(6)–O(9)#4        | 1.471(3)   |
| B(4)–O(7)      | 1.329(4) |                    |            |
| O(5)–B(1)–O(2) | 123.9(3) | O(6)–B(4)–O(5)     | 119.6(3)   |
| O(5)–B(1)–O(4) | 116.0(3) | O(9)–B(5)–O(8)     | 126.1(3)   |
| O(2)–B(1)–O(4) | 120.1(2) | O(9)–B(5)–O(6)#1   | 121.9(3)   |
| O(8)–B(2)–O(3) | 118.0(3) | O(8)–B(5)–O(6)#1   | 112.0(3)   |
| O(8)–B(2)–O(4) | 121.8(3) | O(7)#2–B(6)–O(7)   | 107.2(3)   |
| O(3)–B(2)–O(4) | 120.1(3) | O(7)#2–B(6)–O(9)#3 | 111.72(10) |
| O(1)–B(3)–O(3) | 122.3(3) | O(7)–B(6)–O(9)#3   | 109.11(10) |
| O(1)–B(3)–O(2) | 117.9(3) | O(7)#2–B(6)–O(9)#4 | 109.11(10) |
| O(3)–B(3)–O(2) | 119.8(3) | O(7)–B(6)–O(9)#4   | 111.72(10) |
| O(7)–B(4)–O(6) | 122.0(3) | O(9)#3–B(6)–O(9)#4 | 108.0(3)   |
| O(7)–B(4)–O(5) | 118.4(3) |                    |            |

Symmetry transformations used to generate equivalent atoms:

- |    |                        |    |                              |
|----|------------------------|----|------------------------------|
| #1 | $x - 1/2, y - 1/2, z$  | #2 | $-x + 1, y, -z + 3/2$        |
| #3 | $-x + 1/2, y + 1/2, z$ | #4 | $x + 1/2, y + 1/2, -z + 3/2$ |

**Table S3.** Hydrogen bond lengths (Å) and angles (°) for  $\text{NH}_4\text{B}_{11}\text{O}_{16}(\text{OH})_2$ . D, hydrogen bond donor; A, hydrogen bond acceptor.

| D–H...A    | $d_{(\text{D}-\text{H})}$ | $d_{(\text{H}\cdots\text{A})}$ | $d_{(\text{D}\cdots\text{A})}$ | $\angle_{(\text{D}-\text{H}\cdots\text{A})}$ |
|------------|---------------------------|--------------------------------|--------------------------------|----------------------------------------------|
| O1–H1...O9 | 0.820                     | 2.258                          | 3.010                          | 152.63                                       |
| N1–H2...O8 | 0.956                     | 2.040                          | 2.973                          | 164.72                                       |
| N1–H3...O6 | 0.854                     | 2.339                          | 2.825                          | 116.45                                       |
| N1–H3...O7 | 0.854                     | 2.566                          | 2.995                          | 112.16                                       |

**Table S4.** Configurations of the fundamental building blocks (FBBs) for known ammonium borates and their number ratios of hydroxyl groups to boron atoms.

| Ammonium Borates                                                                     | FBB Configurations                                                                                                   | $N_{\text{OH}}/N_{\text{B}}$ |
|--------------------------------------------------------------------------------------|----------------------------------------------------------------------------------------------------------------------|------------------------------|
| $(\text{NH}_4)_2[\text{B}_4\text{O}_5(\text{OH})_4] \cdot 2\text{H}_2\text{O}$       | $\{4:[\langle 2\Delta 2\text{T} \rangle^{\text{b}}]\}$                                                               | 1                            |
| $\text{NH}_4[\text{B}_5\text{O}_6(\text{OH})_4] \cdot 2\text{H}_2\text{O}$           | $\{5:[\langle 4\Delta\text{T} \rangle^{\text{8}}]\}$                                                                 | 0.8                          |
| $(\text{NH}_4)_3[\text{B}_{15}\text{O}_{20}(\text{OH})_8] \cdot 4\text{H}_2\text{O}$ | $\{15:[3\langle 4\Delta\text{T} \rangle^{\text{8}}]\}$                                                               | 0.53                         |
| $\text{NH}_4[\text{B}_5\text{O}_7(\text{OH})_2] \cdot \text{H}_2\text{O}$            | $\{5:_{\infty}^1[\langle 4\Delta\text{T} \rangle^{\text{8}}]\}$                                                      | 0.4                          |
| $(\text{NH}_4)_2[\text{B}_{10}\text{O}_{14}(\text{OH})_4] \cdot \text{H}_2\text{O}$  | $\{10:_{\infty}^1[2\langle 4\Delta\text{T} \rangle^{\text{8}}]\}$                                                    | 0.4                          |
| $\text{NH}_4\text{B}_{11}\text{O}_{16}(\text{OH})_2$                                 | $\{11:_{\infty}^2[\langle 3\Delta \rangle + \langle 4\Delta\text{T} \rangle^{\text{8}} + \langle 3\Delta \rangle]\}$ | 0.18                         |
| HP- $\text{NH}_4\text{B}_3\text{O}_5$                                                | $\{3:_{\infty}^3[\langle \Delta 2\text{T} \rangle]\}$                                                                | 0                            |
| $\text{NH}_4\text{B}_5\text{O}_8$                                                    | $\{5:_{\infty}^3[\langle 4\Delta\text{T} \rangle^{\text{8}}]\}$                                                      | 0                            |

Note: the superscript “b” expresses the bridge-ring FBB, and the superscript “8” expresses the ‘8’-shaped-ring FBB.

**Figure S1.** Two kinds of hydrogen bonds and their connection environments. Notations of D and A means hydrogen bond donors and acceptors, respectively, for O atoms which are involved in hydrogen bonds (O–H···O and N–H···O).

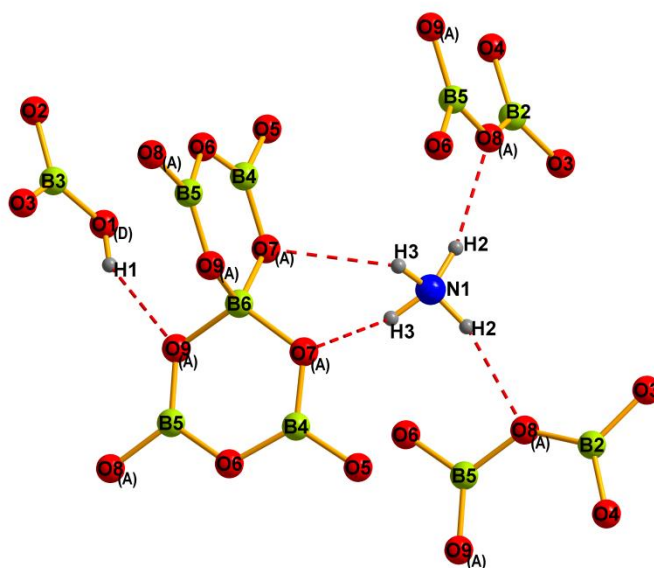

Supplement: c8nj02359j1.pdf [file c8nj02359j1.pdf]
